# Supplementary material
Source: PubMed Central journal article supplement (PMC7861136)
Supplement: pr0c00245_si_002.pdf [file pr0c00245_si_002.pdf]

## Supplemental Information

### **Chemical Penetration Enhancers Increase Hydrogen Peroxide Uptake by *C. elegans* in *In Vivo* Fast Photochemical Oxidation of Proteins**

Jessica A. Espino,<sup>1</sup> Zhihui Zhang,<sup>1†</sup> and Lisa M. Jones<sup>1\*</sup>

<sup>1</sup>*Department of Pharmaceutical Sciences, University of Maryland, Baltimore, Maryland 21202, United States*

\* Authors to whom correspondence should be addressed:

Prof. Lisa M. Jones

Department of Pharmaceutical Sciences

University of Maryland School of Pharmacy

20 N. Pine Street, Room N719

Baltimore, MD 21201

Tel: 1-410-706-3380

Email address: [ljones@rx.umaryland.edu](mailto:ljones@rx.umaryland.edu)

**Table of Contents**

**Supplemental Figures** ..... S3

**Figure S1.** Ubiquitin intact mass analysis. .... S3

**Figure S2.** Background oxidation..... S4

**Figure S3.** *C. elegans* myosin extent of oxidation. .... S5

**Supplemental Tables**..... (.xlsx)

**Table S1.** IV-FPOP oxidatively modified proteins using 200 mM hydrogen peroxide plus 1% AZ..... (.xlsx)

**Table S2.** IV-FPOP oxidatively modified proteins using 200 mM hydrogen peroxide only. .... (.xlsx)

**Table S3.** IV-FPOP oxidatively modified proteins using 200 mM hydrogen peroxide plus 2CPEs..... (.xlsx)

**Table S4.** IV-FPOP oxidatively modified proteins using 200 mM hydrogen peroxide (2CPEs FPOP Control)..... (.xlsx)

## Supplemental Figures

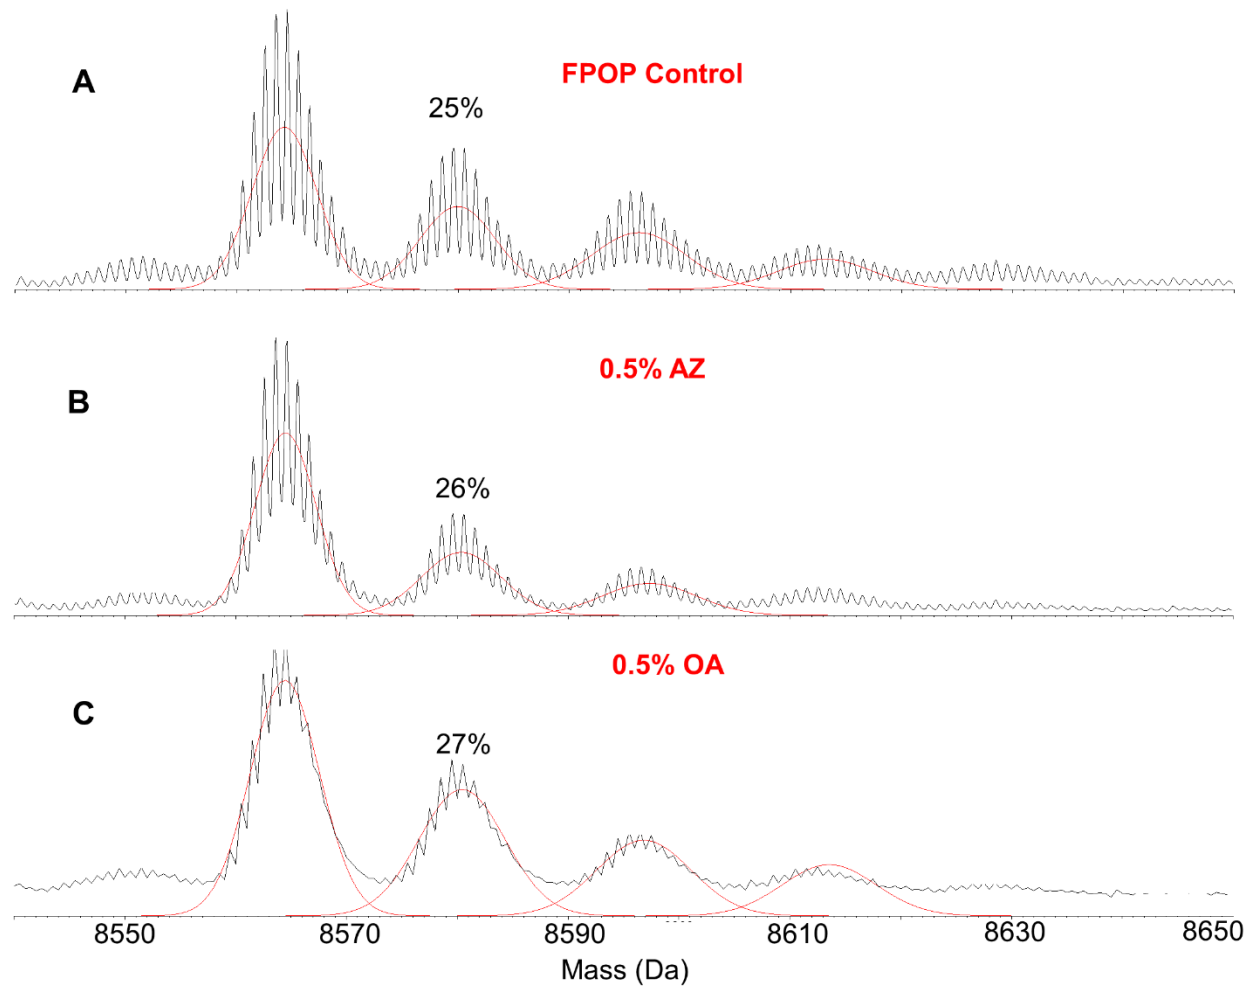

**Figure S1.** Ubiquitin intact mass analysis. (A) Control in vitro FPOP ubiquitin (0% CPE). (B) in vitro FPOP ubiquitin in the presence of 0.5% AZ. (C) in vitro FPOP ubiquitin in the presence of 0.5% OA.

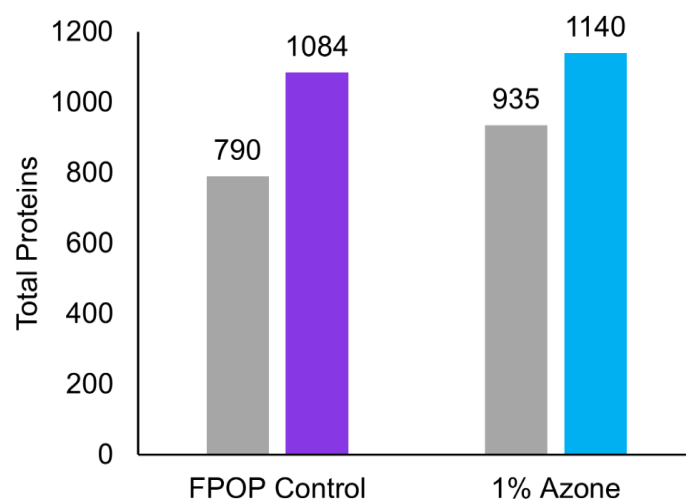

**Figure S2.** Background oxidation. Oxidatively modified proteins in the absence (purple) and presence (blue) of 1% AZ. Grey bars represent the total background oxidation in each condition.

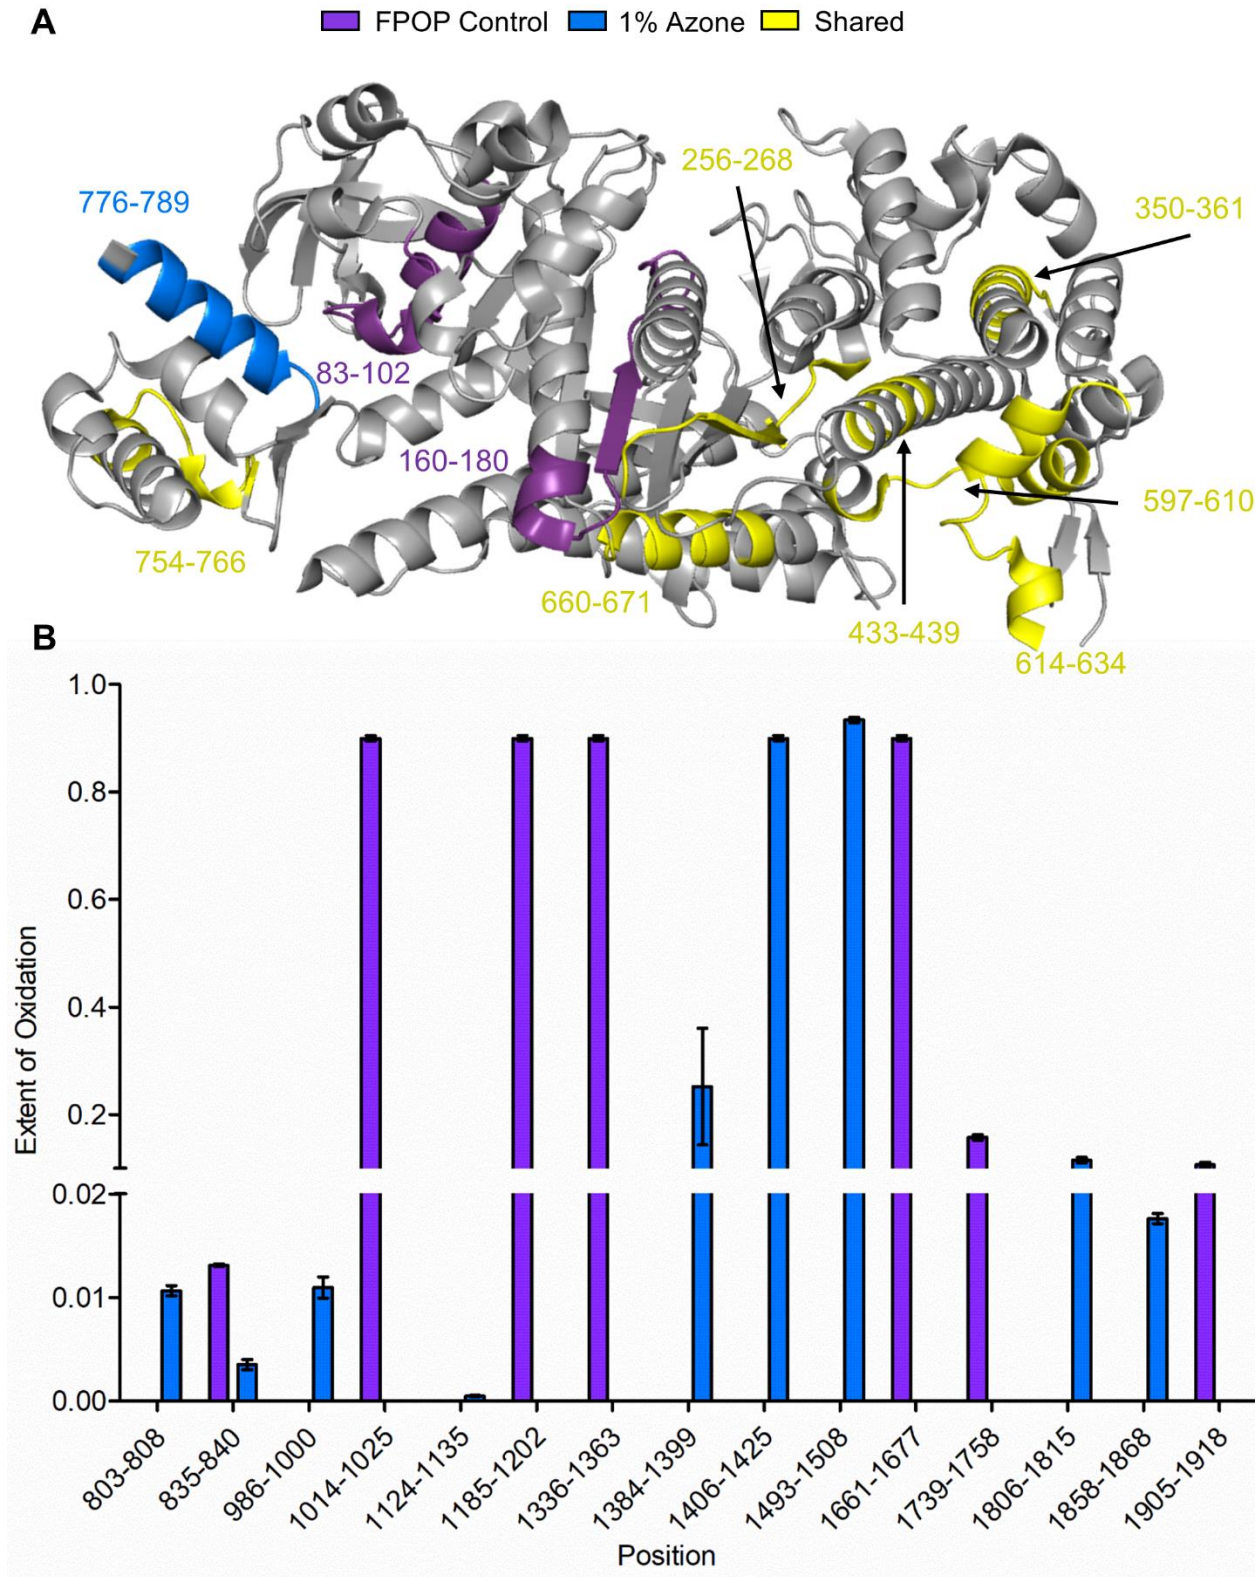

**Figure S3.** *C. elegans* myosin extent of oxidation. (A) N-terminal end oxidatively modified peptides of myosin (PDB: 6QDJ): two modified peptides in the IV-FPOP control group (purple),

one modified peptide in the 1% AZ group (blue), and seven overlapping modified peptides (yellow). (B) C-terminal end oxidatively modified peptides within myosin from the IV-FPOP control group (purple) against 1% AZ group (blue).
